# Supplementary material for: Assembly of 913 microbial genomes from metagenomic sequencing of the cow rumen
Source: PubMed Central journal article supplement (PMC5830445; doi:10.1038/s41467-018-03317-6), 2018-02-28
Supplement: 41467_2018_3317_MOESM1_ESM.pdf [file 41467_2018_3317_MOESM1_ESM.pdf]

**Assembly of 913 microbial genomes from metagenomic sequencing of the cow rumen**

Stewart *et al*

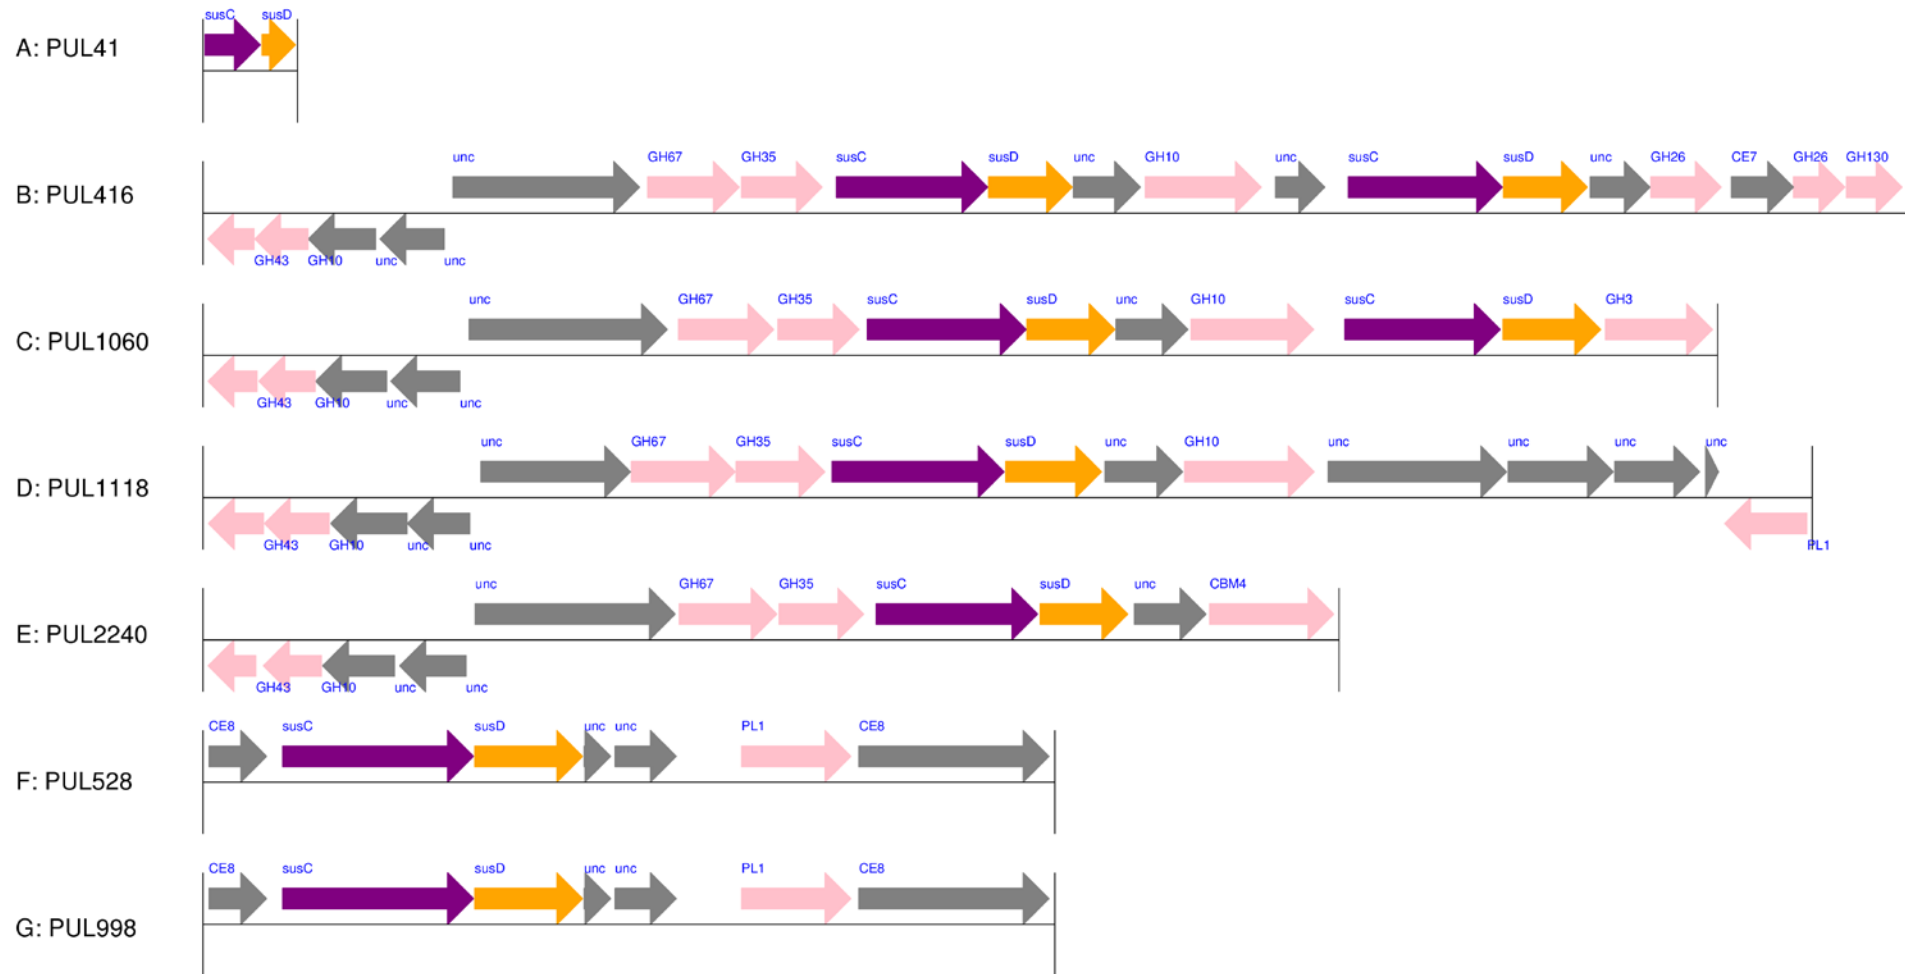

**Supplementary Figure 1** A selection of predicted PULs. A: the most common, a simple *susC*/*susD* pair; B-E: a variety of PULs with similar configurations involved in xylan degradation; F-G: two identical PULs involved in pectin degradation

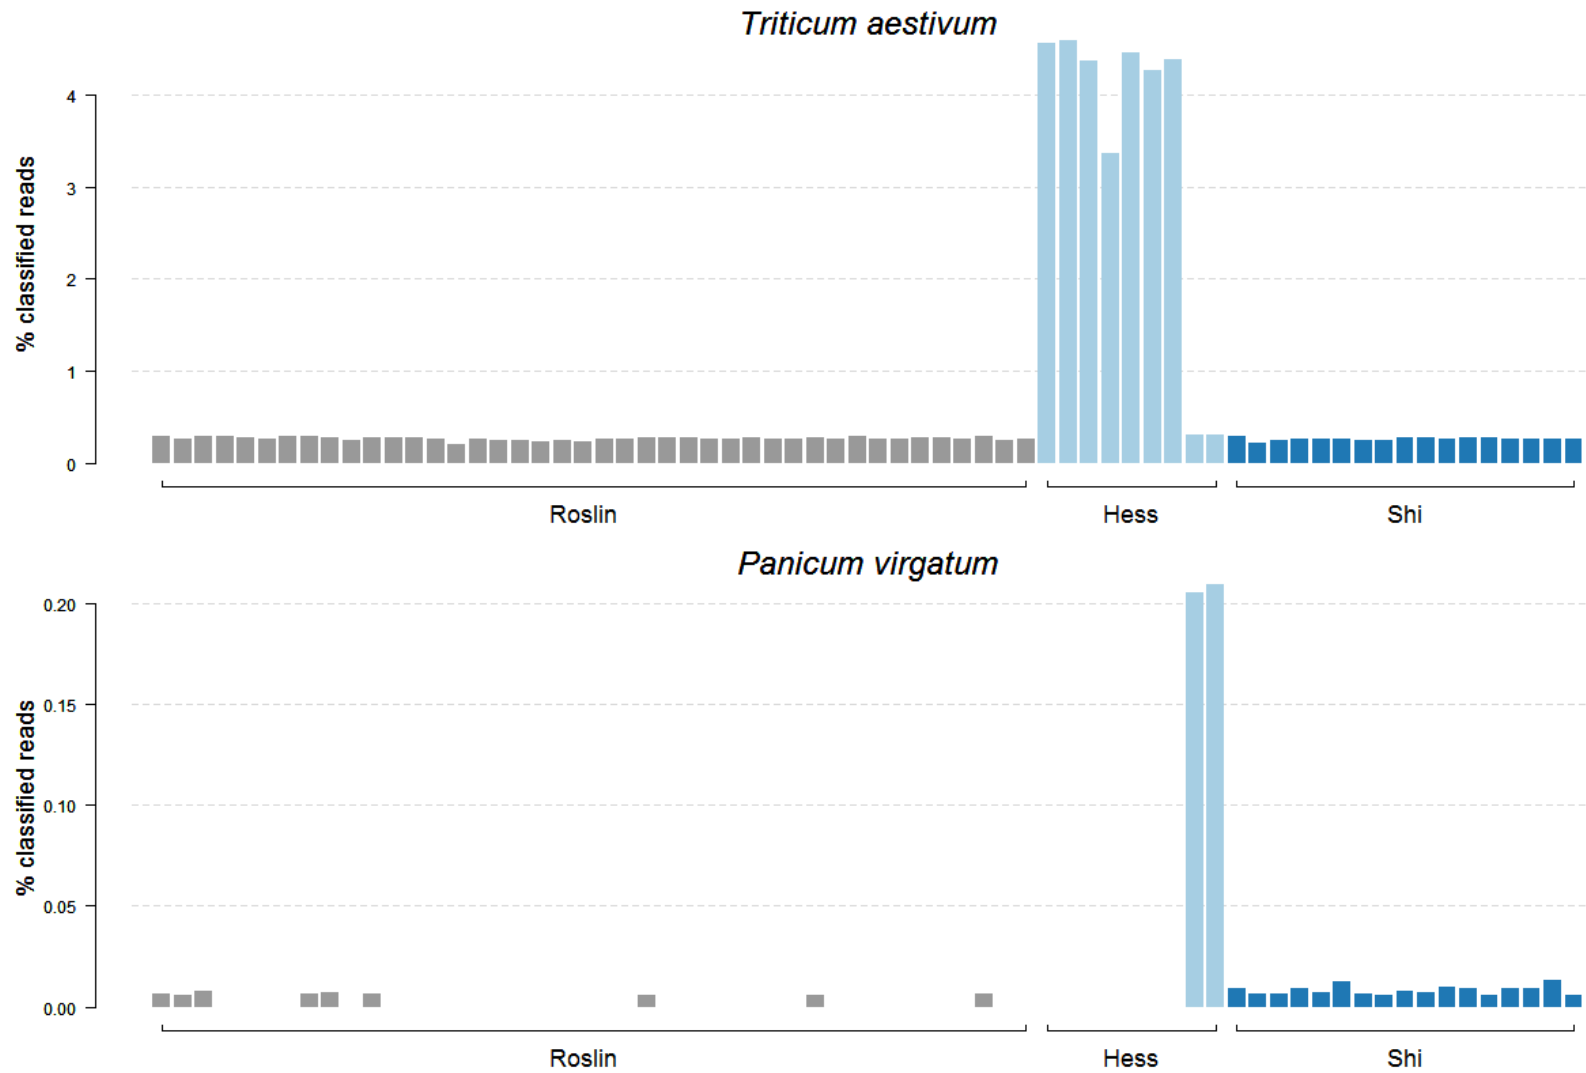

**Supplementary Figure 2** Predicted contamination from plants in our data and the Hess and Shi data (using Centrifuge).



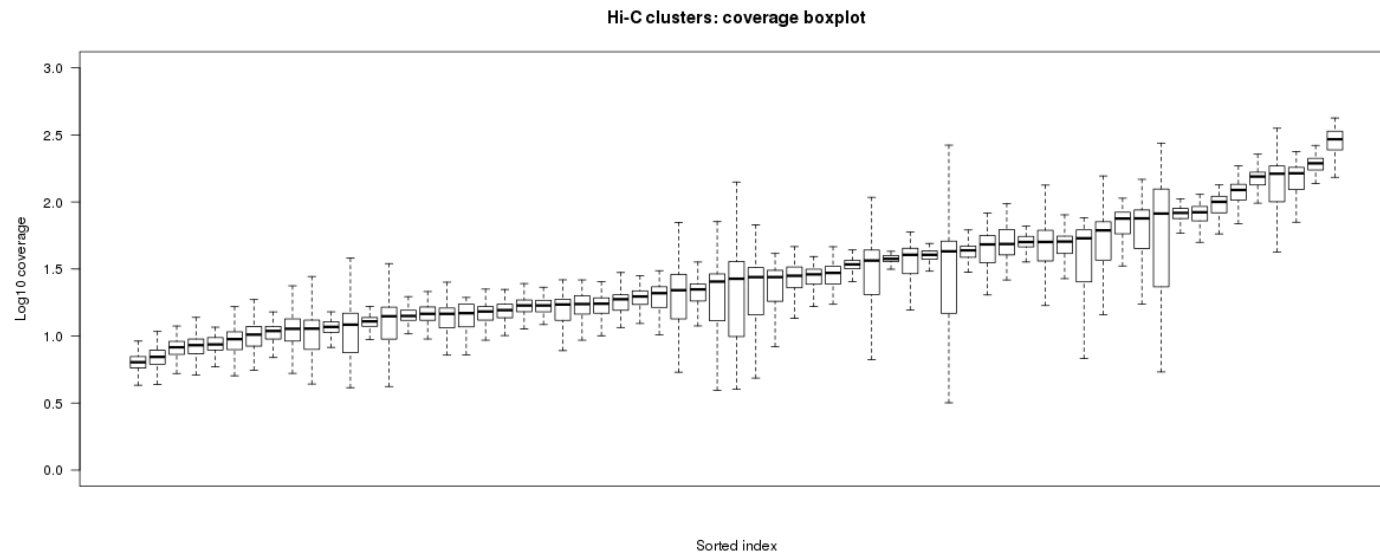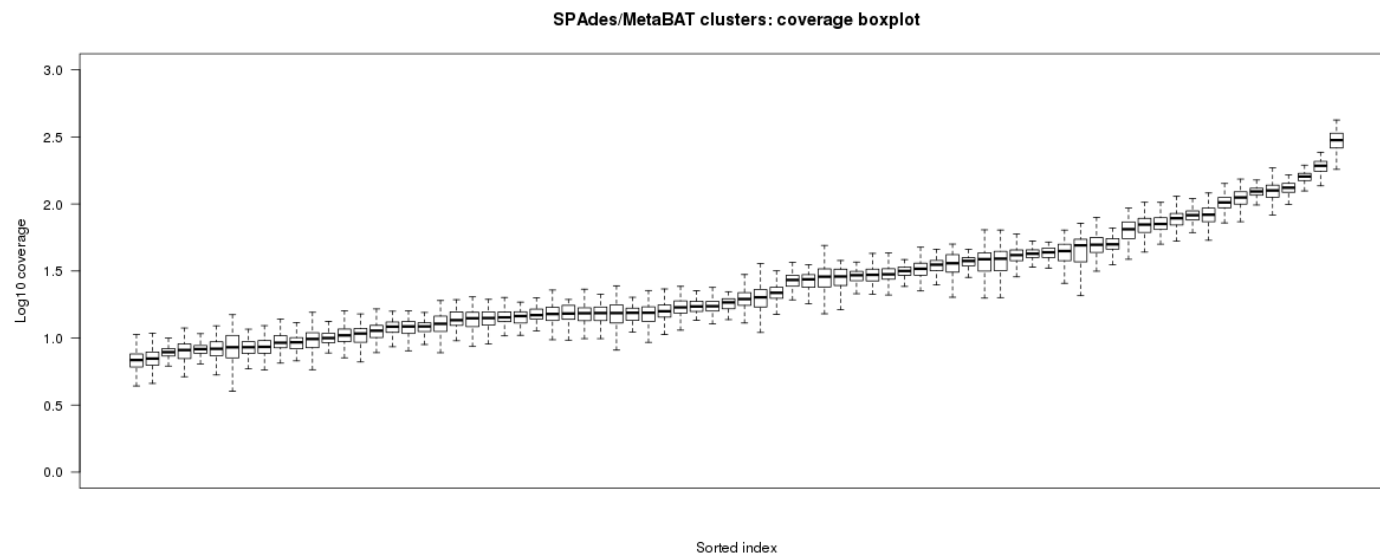

**Supplementary Figure 4** Range of coverage values for contigs within bins from the 63 Hi-C genomes and the 76 metaSPAdes/MetaBAT genomes

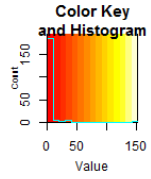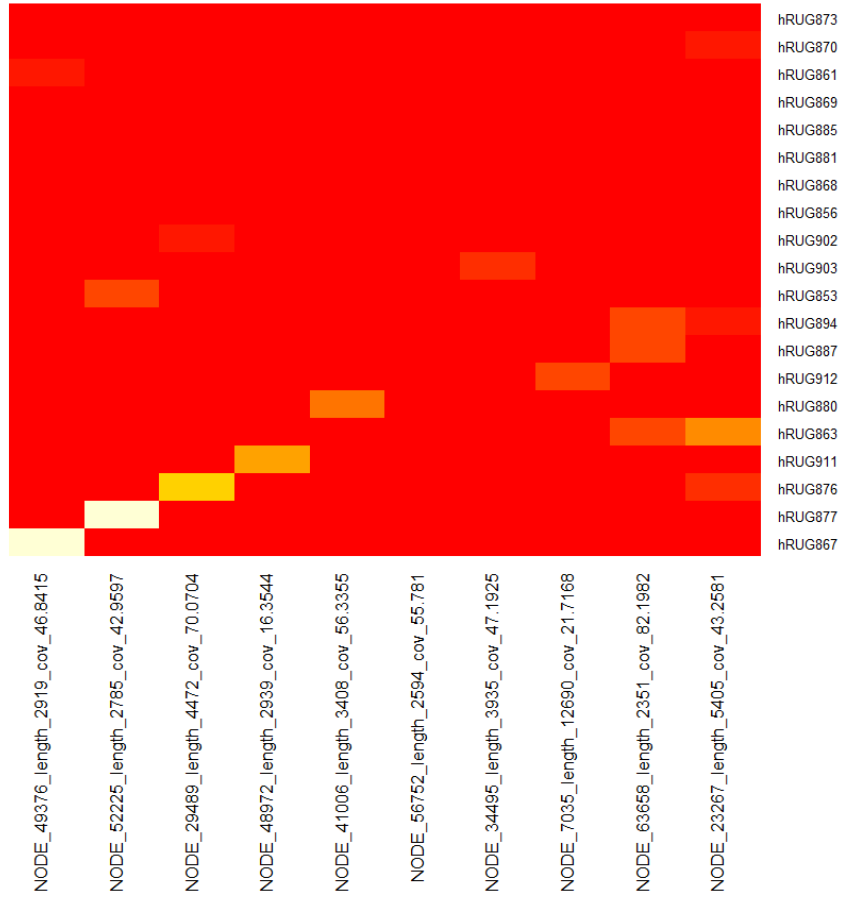

**Supplementary Figure 5** Heatmap of the number of Hi-C links between 10 high coverage contigs with plasmid BLAST hits and 63 high quality hRUG genomes
